# Supplementary material for: Photochemical preparation of pyrrole ring-contracted chlorins by the Wolff rearrangement
Source: Royal Society of Chemistry journal article supplement (doi:10.1039/b612776m), 2006-01-01
Supplement: b612776m.pdf [file b612776m.pdf]

## Supporting Information

### **Photochemical preparation of pyrrole ring-contracted chlorins by the Wolff rearrangement**

Tillmann Köpke, Maren Pink, and Jeffrey M. Zaleski\*

*Department of Chemistry, Indiana University, Bloomington, IN, 47405, USA*

#### **Table of content**

- 1) Synthesis and characterization of **4**, **4a-e**, **5**, **5a-d**, **6a-d**.
- 2) Physical Measurements and Photochemistry
- 3) Crystallographic Data Information for **4d**  
**Figure 1S.**: ORTEP Plot of **4d**.
- 4) Crystallographic Data Information for **4e**  
**Figure 2Sa and b.** ORTEP Plots of **4e**.
- 5) Crystallographic Data Information for **5d**  
**Figure 3S.** ORTEP Plot of **5d**.
- 6) Model fitting for **4d** and **5d**
- 7) References

## 1) Syntheses

**Materials and General Procedures.** All chemicals and solvents were obtained from Aldrich and Fluka. The products were purified by flash chromatography using silica gel (200-400 mesh) or activated neutral aluminum oxide (~150 mesh). UV-visible spectra were obtained using Perkin Elmer Lambda 19 spectrophotometer using Winlab software. <sup>1</sup>H-NMR spectra were recorded on VXR 400 MHz or Gem 300 MHz NMR spectrometers and referenced to the proton resonances resulting from incomplete deuteration of deuterated solvents. Infrared spectra were measured from KBr pellets on a Nicolet 510P FTIR spectrometer. MALDI-TOF, ESI and EI-HRMS data were obtained on a Bruker Biglex III MALDI-TOF mass spectrometer, a PE-Sciex API III Triple Quadrupole and Thermo-Finnigan MAT 95 XP high resolution mass spectrometers, respectively.

### **(2-diazo-3-oxo-5,10,15,20-tetraphenylchlorinato)nickel(II) (4).<sup>1</sup>**

(2,3-dioxo-5,10,15,20-tetraphenylchlorinato)nickel(II) (**1**) (40 mg, 0.056 mmol) was dissolved in CH<sub>2</sub>Cl<sub>2</sub> (25 ml) and *p*-toluenesulfonylhydrazine (183 mg, 20 eq) was added. The reagents were stirred for 9 h under reflux. The reaction mixture was cooled to room temperature and the solvent evaporated under reduced pressure. The purple residue was purified on an Al<sub>2</sub>O<sub>3</sub> column with CH<sub>2</sub>Cl<sub>2</sub>/hexanes (2:1) as the eluent. Yield: 24 mg (60%). ESI *m/z* isotope pattern at 713.2 (M<sup>+</sup>); EI-HRMS Calcd. for C<sub>44</sub>H<sub>26</sub>N<sub>4</sub>ONi (M-N<sub>2</sub>): 684.1455, Found: 684.1426; <sup>1</sup>H NMR (CDCl<sub>3</sub>): δ 8.61-8.59 (d, 1H, β-pyrrolic H), 8.52-8.47 (m, 4H, β-pyrrolic H), 8.43-8.41 (d, 1H, β-pyrrolic H), 7.93-7.88 (m, 6H, meso-ArH), 7.68-7.63 (m, 14H, meso-ArH); IR (cm<sup>-1</sup>): 2103, 1669, 1594, 1553, 1528, 1448, 1390, 1363, 1338, 1175, 1139, 1069, 1010, 1003, 831, 792, 745, 697.

**(2-diazo-3-oxo-5,10,15,20-tetraphenylchlorinato)copper(II) (5).<sup>1</sup>**

(2,3-dioxo-5,10,15,20-tetraphenylchlorinato)copper(II) (**2**) (65 mg, 0.09 mmol) was dissolved in CH<sub>2</sub>Cl<sub>2</sub> (50 ml) and *p*-toluenesulfonylhydrazine (345 mg, 20 eq) was added. The reaction mixture was stirred for 6 h under reflux and cooled to room temperature. The solvent was subsequently evaporated under reduced pressure. The dark green residue was purified on a silica gel column with CH<sub>2</sub>Cl<sub>2</sub>/hexanes (2:1) as the eluent. Yield: 51 mg (77%). MALDI-TOF: *m/z* = 689.2 (M – N<sub>2</sub>); ESI: *m/z* isotope pattern at 718.2 (M<sup>+</sup>); EI-HRMS: Calcd. for C<sub>44</sub>H<sub>26</sub>N<sub>6</sub>OCu (M – N<sub>2</sub>): 689.1397, Found: 689.1397; IR (cm<sup>-1</sup>): 2098, 1735, 1669, 1598, 1576, 1510, 1432, 1388, 1342, 1273, 1175, 1133, 1071, 1007, 991, 844, 795, 795, 750, 702.

**(2-diazo-3-oxo-5,10,15,20-tetraphenylchlorinato)zinc(II) (6)**

(2,3-dioxo-5,10,15,20-tetraphenylchlorinato)zinc(II) (**3**) (65 mg, 0.09 mmol) was dissolved in CH<sub>2</sub>Cl<sub>2</sub> (50ml) and *p*-toluenesulfonylhydrazine (342 mg, 20 equiv.) was added. The reaction mixture was stirred for 3 h under reflux conditions. The resulting mixture was cooled to room temperature and the solvent was evaporated under reduced pressure. The dark green residue was purified on Al<sub>2</sub>O<sub>3</sub> column with CH<sub>2</sub>Cl<sub>2</sub>/Hexanes (2:1) as eluent. Yield: 74%.

UV-Vis (CH<sub>2</sub>Cl<sub>2</sub>): λ<sub>max</sub> (log ε) = 616 (4.11), 567 (3.66), 433 (4.94); IR (cm<sup>-1</sup>): 3053, 2130, 2095, 1668, 1485, 1441, 1417, 1363, 1321, 1237, 1175, 1130, 1071, 1007, 987, 797, 756, 740, 702; <sup>1</sup>H NMR (DMSO-*d*<sub>6</sub>): δ 8.65-8.64 (d, 1H, β-pyrrolic H), 8.57-8.50 (m, 3H, β-pyrrolic H), 8.46-8.45 (d, 1H, β-pyrrolic H), 8.31-8.30 (d, 1H, β-pyrrolic H), 8.13-8.11 (m, 6H, meso-ArH), 7.84-7.70 (m, 11H, meso-ArH), 7.65-7.61 (m, 3H, meso-ArH); ESI *m/z* isotope pattern at 720 (MH<sup>+</sup>); EI-HRMS Calcd. for C<sub>44</sub>H<sub>26</sub>N<sub>4</sub>OZn (M-N<sub>2</sub>): 690.1393, Found: 690.1390.

## 2) Physical Measurements

Photolyses were performed using a linear optical path photochemistry apparatus. A 1000-W XeHg lamp (Oriel model 66021) was collimated through a cooled filter bath and subsequently focused on a stirring sample contained within a second cooled chamber. The lamp-sample distance measures 30 inches. For the  $\lambda \geq 395$  nm experiments, the cutoff wavelength was selected using a series of long-wavelength pass Schott filters (Oriel 51872). Samples were contained in Pyrex vessels and maintained at 10 °C using a temperature-controlled recirculating bath.

Quantum yield measurements for the photochemical reaction of **5** are reported relative to  $K_3[Fe(C_2O_4)_3] \cdot 3 H_2O$ . The quantum yield for **5** was performed via photolysis at 365 nm with 1000-W HgXe source utilizing a 365 nm notch filter. From a total of 8 measurements, the quantum yield for the bleaching of the electronic spectra at 430 nm of **5** ( $\Phi_{365}$ ) was determined to be 0.13 ( $\pm 0.04$ ).

## Photochemistry

### Broadband Photolysis of (2-diazo-3-oxo-5,10,15,20-tetraphenylchlorinato)nickel(II) (**4**).

A solution of **4** (20 mg, 0.028 mmol) in 25 ml degassed dichloromethane and 15 ml dried and degassed methanol was irradiated with a HgXe lamp (200 W) for 6 h at 10 °C in a pyrex vessel under a nitrogen atmosphere. The solvent was evaporated under reduced pressure and the residue purified on silica gel with hexanes/ $CH_2Cl_2$  (2:1) as the eluent. Analytically pure compounds were obtained by chromatography on a silica gel plate using hexanes/ $CH_2Cl_2$  (2:1) as the eluent. Yields: 1.8 mg unreacted starting material **4**, black residue (4 mg), (2-hydroxy-5,10,15,20-tetraphenylchlorinato)nickel(II) **4a** (0.5 mg, 3%), (2-methoxy-3-oxo-5,10,15,20-tetra-

phenylchlorinato)nickel(II) **4b** (0.9 mg, 5%), (2,2-dimethoxy-3-oxo-5,10,15,20-tetraphenylchlorinato)nickel(II) **4c** (6.0 mg, 32%), (5,10,15,20-tetraphenylazeteoporphyrinato)nickel(II) **4d** (3.0 mg, 16%), dimer **4e** (traces). Crystals suitable for X-ray diffraction studies were obtained from slow vapor diffusion of diethylether into CH<sub>2</sub>Cl<sub>2</sub> for **4d** and slow diffusion of methanol into CH<sub>2</sub>Cl<sub>2</sub> for **4e**.

**Photolysis ( $\lambda \geq 395$  nm) of (2-diazo-3-oxo-5,10,15,20-tetraphenylchlorinato)nickel(II) (**4**).**

A solution of **4** (10 mg, 0.014 mmol) in 13 ml degassed dichloromethane and 8 ml dried and degassed methanol was irradiated with a HgXe lamp (200 W) for 48 h at 10 °C in a pyrex vessel under a nitrogen. The solvent was evaporated under reduced pressure and the residue purified on a silica gel column with hexanes/CH<sub>2</sub>Cl<sub>2</sub> (2:1) as the eluent. Analytically pure compounds were obtained by chromatography on a silica gel plate using hexanes/CH<sub>2</sub>Cl<sub>2</sub> (2:1) as the eluent. Yields: 1.4 mg unreacted starting material **4**, black residue (1.5 mg), (2-hydroxy-5,10,15,20-tetraphenyl-porphyrinato)nickel(II) **4a** (traces), (2-methoxy-3-oxo-5,10,15,20-tetraphenylchlorinato)nickel(II) **4b** (0.2 mg, 2%), (2,2-dimethoxy-3-oxo-5,10,15,20-tetraphenylchlorinato)nickel(II) **4c** (0.6 mg, 7%), (5,10,15,20-tetraphenylazeteoporphyrinato)nickel(II) **4d** (0.5 mg, 6%).

**(2-hydroxy-5,10,15,20-tetraphenylporphyrinato)nickel(II) 4a:**

MALDI-TOF *m/z* isotope pattern at 686; EI-HRMS Calcd. for C<sub>44</sub>H<sub>28</sub>N<sub>4</sub>ONi: 686.1611, Found: 686.1578.

**(2-methoxy-3-oxo-5,10,15,20-tetraphenylchlorinato)nickel(II) 4b:**

MALDI-TOF  $m/z$  isotope pattern at 716.5 (M); EI-HRMS Calcd. for  $C_{45}H_{30}N_4O_2Ni$ : 717.1717, Found: 717.1741; IR ( $cm^{-1}$ ): 2921, 1729, 1652, 1639, 1597, 1558, 1440, 1383, 1349, 1243, 1154, 1069, 1004, 793, 751, 698, 555, 503.

**(2,2-dimethoxy-3-oxo-5,10,15,20-tetraphenylchlorinato)nickel(II) 4c:**

MALDI-TOF  $m/z$  isotope pattern at 746.5 (M); EI-HRMS Calcd. for  $C_{46}H_{32}N_4O_3Ni$ : 746.1822, Found: 746.1833;  $^1H$  NMR ( $CDCl_3$ ):  $\delta$  8.44-8.37 (m, 3H,  $\beta$ -pyrrolic H), 8.29-8.27 (m, 2H,  $\beta$ -pyrrolic H), 8.07-8.06 (d, 1H,  $\beta$ -pyrrolic H,  $J = 4$  Hz), 7.88-7.86 (m, 4H, meso-ArH), 7.72-7.50 (m, 16H, meso-ArH), 3.34 (s, 6H,  $CH_3$ ); IR ( $cm^{-1}$ ): 2920, 1727, 1597, 1549, 1440, 1347, 1240, 1154, 1066, 1007, 793, 750, 715, 698, 502.

**(5,10,15,20-tetraphenylazeteoporphyrinato)nickel(II) 4d:**

MALDI-TOF  $m/z$  isotope pattern at 717 ( $M^+$ ); EI-HRMS Calcd. for  $C_{45}H_{30}N_4O_2Ni$ : 716.1717, Found: 716.1723;  $^1H$  NMR ( $CDCl_3$ ):  $\delta$  8.52-8.47 (m, 4H,  $\beta$ -pyrrolic H), 8.30 (s, 2H,  $\beta$ -pyrrolic H), 7.99-7.97 (m, 3H, meso-ArH), 7.90-7.88 (m, 3H, meso-ArH), 7.68-7.58 (m, 14H, meso-ArH), 5.97 (s, 1H,  $t$ -CH), 3.40 (s, 3H,  $CH_3$ ); IR ( $cm^{-1}$ ): 1742, 1674, 1599, 1567, 1511, 1440, 1361, 1344, 1260, 1155, 1066, 1019, 1005, 796, 752, 700; X-ray structure: Figure 1S.

**Dinickel Chlorin Dimer 4e:**

MALDI-TOF  $m/z$  isotope pattern at 1370 ( $M^+$ ); X-ray structure: Figure 2S.

**Broadband Photolysis of (2-diazo-3-oxo-5,10,15,20-tetraphenylchlorinato)copper(II) (5).**

A solution of 15 mg (0.0209 mmol) **5** in 15 ml degassed dichloromethane and 8 ml dried and degassed methanol was irradiated with a HgXe lamp (200 W) for 6 h at 10 °C in a pyrex vessel under a nitrogen atmosphere. The solvent was evaporated under reduced pressure and the residue

purified on a silica gel column with hexanes/CH<sub>2</sub>Cl<sub>2</sub> (2:1) as the eluent. Analytically pure compounds were obtained by chromatography on a silica gel plate using hexanes/CH<sub>2</sub>Cl<sub>2</sub> (2:1) as the eluent. Yields: Black residue (2 mg), (2-hydroxy-5,10,15,20-tetraphenylporphyrinato)copper(II) **5a** (3.2 mg, 22%), (2-methoxy-3-oxo-5,10,15,20-tetraphenylchlorinato)copper(II) **5b** (0.6 mg, 4%), (2,2-dimethoxy-3-oxo-5,10,15,20-tetraphenylchlorinato)copper(II) **5c** (1.6 mg, 10%), (5,10,15,20-tetraphenylazeteoporphyrinato)copper(II) **5d** (1.1 mg, 7%). Crystals suitable for X-ray diffraction studies were obtained from slow vapor diffusion of diethylether into CH<sub>2</sub>Cl<sub>2</sub> for **5d**.

**Photolysis ( $\lambda \geq 395$  nm) of (2-diazo-3-oxo-5,10,15,20-tetraphenylchlorinato)copper(II) (**5**).**

15.0 mg (0.0209 mmol) of **5** in 15 ml degassed dichloromethane and 10 ml dried and degassed methanol were irradiated with a HgXe lamp (200 W,  $\lambda \geq 395$ nm) for 48 h at 10 °C in a pyrex vessel under a nitrogen atmosphere. The solvent was evaporated under reduced pressure and the residue purified on silica gel with hexanes/CH<sub>2</sub>Cl<sub>2</sub> (2:1). Analytically pure compound were obtained by chromatography on a silica gel plate using hexanes/CH<sub>2</sub>Cl<sub>2</sub> (2:1) as the eluent. Yields: 1.2 mg unreacted starting material **5**, black residue (2 mg), (2-hydroxy-5,10,15,20-tetraphenylporphyrinato)copper(II) **5a** (1.3 mg, 10%), (2-methoxy-3-oxo-5,10,15,20-tetraphenylchlorinato)copper(II) **5b** (0.5 mg, 4%), (2,2-dimethoxy-3-oxo-5,10,15,20-tetraphenylchlorinato)copper(II) **5c** (1.1 mg, 8%), (5,10,15,20-tetraphenylazeteoporphyrinato)copper(II) **5d** (1.1 mg, 8%).

**(2-hydroxy-5,10,15,20-tetraphenylporphyrinato)copper(II) 5a:**

MALDI-TOF  $m/z$  isotope pattern at 691(M); EI-HRMS Calcd. for  $C_{44}H_{28}N_4OCu$ : 691.1554, Found: 691.1550.

**(2-methoxy-3-oxo-5,10,15,20-tetraphenylchlorinato)copper(II) 5b:**

MALDI-TOF  $m/z$  isotope pattern at 721.3 (M); EI-HRMS Calcd. for  $C_{45}H_{30}N_4O_2Cu$ : 721.1659, Found: 721.1658; IR ( $cm^{-1}$ ): 2921, 1729, 1597, 1539, 1489, 1440, 1343, 1240, 1155, 1066, 1004, 993, 833, 795, 750, 718, 699, 661, 571, 446.

**(2,2-dimethoxy-3-oxo-5,10,15,20-tetraphenylchlorinato)copper(II) 5c:**

MALDI-TOF  $m/z$  isotope pattern at 751.8 (M); EI-HRMS Calcd. for  $C_{46}H_{32}N_4O_3Cu$ : 751.1765, Found: 751.1772; IR ( $cm^{-1}$ ): 2921, 1733, 1597, 1540, 1540, 1488, 1440, 1384, 1344, 1211, 1154, 1092, 1070, 1008, 888, 833, 796, 752, 739, 700, 620, 555, 502, 446.

**(5,10,15,20-tetraphenylazeteoporphyrinato)copper(II) 5d:**

MALDI-TOF  $m/z$  isotope pattern at 722 ( $M^+$ ); EI-HRMS Calcd. for  $C_{45}H_{30}N_4O_2Cu$ : 721.1665, Found: 721.1666; IR ( $cm^{-1}$ ): 1741, 1648, 1597, 1543, 1499, 1433, 1336, 1212, 1154, 1065, 1024, 1003, 994, 833, 795, 753, 725, 702, 639, 555, 503; X-ray structure: Figure 3S.

**Broadband Photolysis of (2-diazo-3-oxo-5,10,15,20-tetraphenylchlorinato)zinc(II) (6).**

A solution of **6** (10 mg, 0.014 mmol) in 13 ml degassed dichloromethane and 8 ml dried and degassed methanol was irradiated with a HgXe lamp (200 W) for 6 h at 10 °C in a pyrex vessel under a nitrogen. The solvent was evaporated under reduced pressure and the residue purified on a  $Al_2O_3$  column with  $CH_2Cl_2$ /Hexanes (4:1) as eluent.

Yields: 1.0 mg unreacted starting material **6**, black residue (1.5 mg), (2-hydroxy-5,10,15,20-tetraphenylporphyrinato)zinc(II) **6a** (traces), (2-methoxy-3-oxo-5,10,15,20-tetraphenyl-



chlorinato)zinc(II) **6b** (0.4 mg, 4%), (2,2-dimethoxy-3-oxo-5,10,15,20-tetraphenylchlorinato)zinc(II) **6c** (0.7 mg, 7%), (5,10,15,20-tetraphenylazeteoporphyinato)zinc(II) **6d** (0.6 mg, 6%).

**(2-hydroxy-5,10,15,20-tetraphenylporphyrinato)zinc(II) 6a:**

MALDI-TOF *m/z* isotope pattern at 692.

**(2-methoxy-3-oxo-5,10,15,20-tetraphenylchlorinato)zinc(II) 6b:**

MALDI-TOF *m/z* isotope pattern at 723 (M) and 695(M-CO).

**(2,2-dimethoxy-3-oxo-5,10,15,20-tetraphenylchlorinato)zinc(II) 6c:**

MALDI-TOF *m/z* isotope pattern at 752 (M) and 724 (M-CO); EI-HRMS Calcd. for  $C_{46}H_{33}N_4O_3Zn(MH^+)$ :753.1839, Found: 753.1815.

**(5,10,15,20-tetraphenylazeteoporphyinato)zinc(II) 6d:**

MALDI-TOF *m/z* isotope pattern at 722 ( $M^+$ ); EI-HRMS Calcd. for  $C_{45}H_{30}N_4O_2Zn(M^+)$ : 722.1655, Found: 722.1659.

### 3) Crystallographic Data Information for 4d

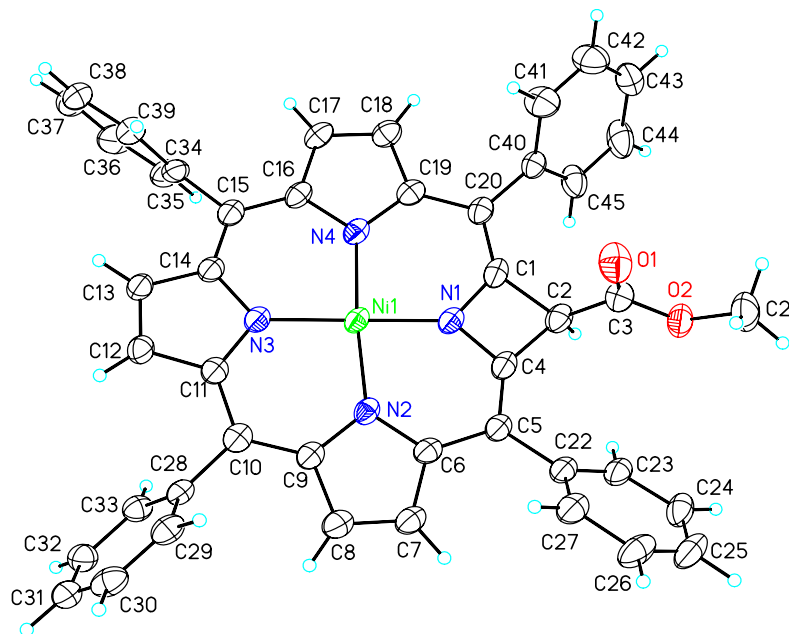

**Figure 1S.** ORTEP plot of **4d** at 50% probability.

A dark crystal (approximate dimensions  $0.25 \times 0.23 \times 0.18 \text{ mm}^3$ ) was placed onto the tip of a 0.1 mm diameter glass capillary and mounted on a SMART6000 (Bruker) at 130(2) K.

### Data collection

The data collection was carried out using Mo  $K\alpha$  radiation (graphite monochromator) with a frame time of 20 seconds and a detector distance of 5.0 cm. A randomly oriented region of reciprocal space was surveyed to the extent of a sphere. Four major sections of frames were collected with  $0.30^\circ$  steps in  $\omega$  at different  $\phi$  settings and a detector position of  $-43^\circ$  in  $2\theta$ . An additional set of 50 frames was collected in order to model decay. Data to a resolution of  $0.84 \text{ \AA}$  were considered in the reduction. Final cell constants were calculated from the xyz centroids of 6982 strong reflections from the actual data collection after integration (SAINT).<sup>2</sup> The intensity data were corrected for absorption (SADABS).<sup>3</sup>

### **Structure solution and refinement**

The space group Pbcn was determined based on intensity statistics and systematic absences. The structure was solved using SIR-92<sup>4</sup> and refined with SHELXL-97<sup>5</sup>. A direct-methods solution was calculated which provided most non-hydrogen atoms from the E-map. Full-matrix least squares / difference Fourier cycles were performed which located the remaining non-hydrogen atoms. All non-hydrogen atoms were refined with anisotropic displacement parameters. The hydrogen atoms were placed in ideal positions and refined as riding atoms with individual isotropic displacement parameters. The final full matrix least squares refinement converged to  $R1 = 0.0441$  and  $wR2 = 0.1073$  ( $F^2$ , all data). The remaining electron density is located near the metal.

#### 4) Crystallographic Data Information for 4e

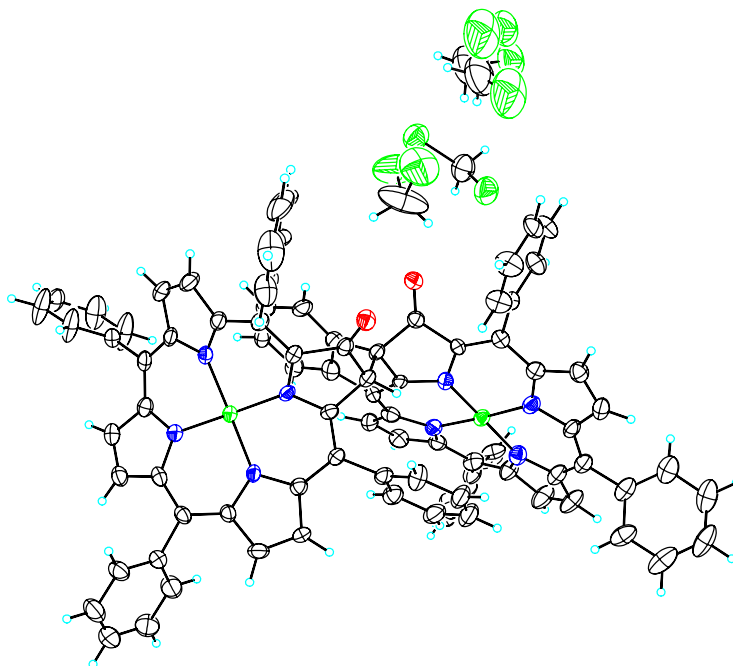

Figure 2Sa. ORTEP plot of 4e at 50% probability.

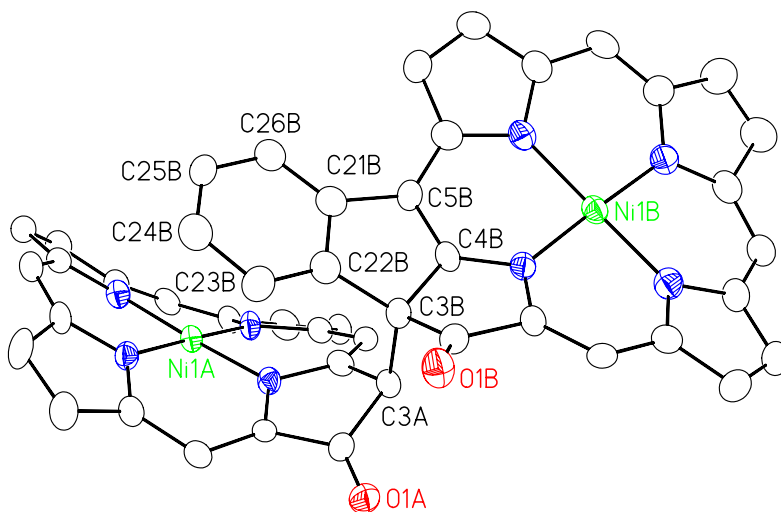

Figure 2Sb. ORTEP plot of 4e at 50% probability, hydrogen atoms and solvent omitted for clarity. Phenyl rings have also been simplified to minimize congestion. Only connectivity related atoms and metal centers are labeled.

## Data Collection

The data collection was carried out using Mo K $\alpha$  radiation (graphite monochromator) with a frame time of 50 seconds and a detector distance of 5.0 cm. A randomly oriented region of reciprocal space was surveyed to the extent of 1.3 hemispheres. Three major sections of frames were collected with 0.30° steps in  $\omega$  at different  $\phi$  settings and a detector position of  $-43^\circ$  in  $2\theta$ . Data to a resolution of 0.84 Å were considered in the reduction. Final cell constants were calculated from the xyz centroids of 2367 strong reflections from the actual data collection after integration (SAINT)<sup>2</sup>. The intensity data were corrected for absorption (SADABS)<sup>3</sup>.

## Structure solution and refinement

The space group P2<sub>1</sub>/n was determined based on intensity statistics and systematic absences. The structure was solved using SIR-92<sup>4</sup> and refined with SHELXL-97<sup>5</sup>. A direct-methods solution was calculated which provided most non-hydrogen atoms from the E-map. Full-matrix least squares / difference Fourier cycles were performed which located the remaining non-hydrogen atoms. All non-hydrogen atoms were refined with anisotropic displacement parameters. The hydrogen atoms were placed in ideal positions and refined as riding atoms with relative isotropic displacement parameters. The final full matrix least squares refinement converged to R1 = 0.0715 and wR2 = 0.2276 (F<sup>2</sup>, all data). The remaining electron density is located near the disordered solvent. The data to parameter ratio is low due to the weak diffraction of the very small crystal.

## 5) Crystallographic Data Information for 5d

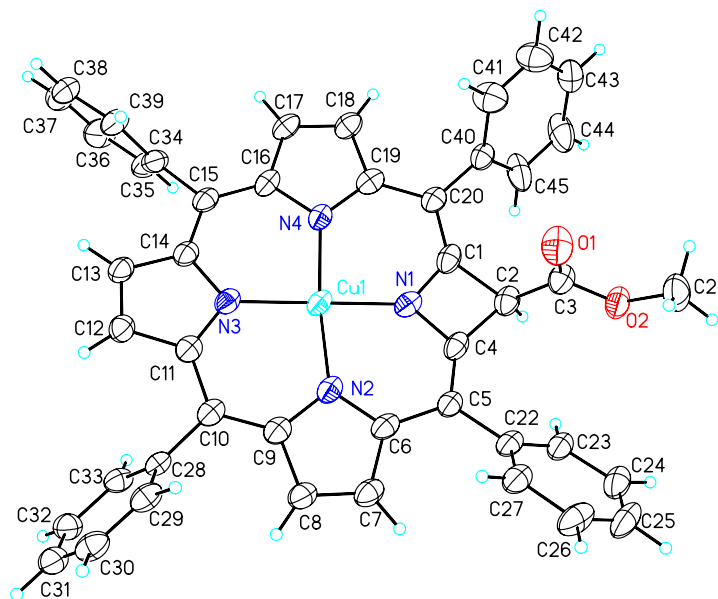

**Figure 3S.** ORTEP plot of **5d** at 50% probability.

A dark blue crystal (approximate dimensions  $0.15 \times 0.11 \times 0.10 \text{ mm}^3$ ) was placed onto the tip of a 0.1 mm diameter glass capillary and mounted on a SMART6000 (Bruker) at 130(2) K.

### Data collection

The data collection was carried out using Mo  $K\alpha$  radiation (graphite monochromator) with a frame time of 60 seconds and a detector distance of 5.0 cm. A randomly oriented region of reciprocal space was surveyed to the extent of a sphere. Four major sections of frames were collected with  $0.30^\circ$  steps in  $\omega$  at different  $\phi$  settings and a detector position of  $-43^\circ$  in  $2\theta$ . Data to a resolution of  $0.80 \text{ \AA}$  were considered in the reduction. Final cell constants were calculated from the xyz centroids of 4312 strong reflections from the actual data collection after integration (SAINT)<sup>2</sup>. The intensity data were corrected for absorption (SADABS)<sup>3</sup>.

## Structure solution and refinement

The space group Pbcn was determined based on intensity statistics and systematic absences. The structure was solved using SIR-92<sup>4</sup> and refined with SHELXL-97<sup>5</sup>. A direct-methods solution was calculated which provided most non-hydrogen atoms from the E-map. Full-matrix least squares / difference Fourier cycles were performed which located the remaining non-hydrogen atoms. All non-hydrogen atoms were refined with anisotropic displacement parameters. The hydrogen atoms were placed in ideal positions and refined as riding atoms with relative isotropic displacement parameters. The final full matrix least squares refinement converged to R1 = 0.0522 and wR2 = 0.1233 (F<sup>2</sup>, all data). The remaining electron density is located near the metal.

## 6) Model fitting for 4d and 5d

Orthogonal coordinates from **4d** fit onto fractional coordinates of **5d**

Atom model deviation for atoms fitted

|     |     |       |
|-----|-----|-------|
| Cu1 | Ni1 | 0.019 |
| N1  | N1  | 0.049 |
| N2  | N2  | 0.063 |
| N3  | N3  | 0.043 |
| N4  | N4  | 0.062 |

Weighted R.M.S. Deviation = 0.0496 Å

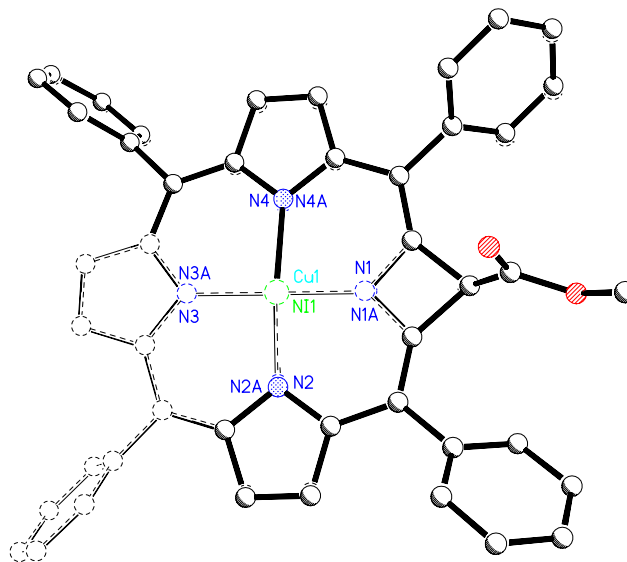

Idealized Crystal Coordinates for all model atoms

| NAME | SFAC | X       | Y       | Z       | NEAREST ATOM | DEVIATION |
|------|------|---------|---------|---------|--------------|-----------|
| Ni1  | 3    | 0.88142 | 0.20300 | 0.20408 | CU1          | 0.019     |
| O1   | 4    | 0.78851 | 0.33657 | 0.36438 | O1           | 0.056     |

|     |   |         |          |          |     |       |
|-----|---|---------|----------|----------|-----|-------|
| O2  | 4 | 0.89337 | 0.34296  | 0.41269  | O2  | 0.085 |
| N1  | 3 | 0.90121 | 0.25262  | 0.26329  | N1  | 0.049 |
| N2  | 3 | 0.88797 | 0.07944  | 0.23349  | N2  | 0.063 |
| N3  | 3 | 0.86180 | 0.15224  | 0.14219  | N3  | 0.043 |
| N4  | 3 | 0.87318 | 0.33110  | 0.18063  | N4  | 0.062 |
| C1  | 1 | 0.90021 | 0.34260  | 0.28094  | C1  | 0.043 |
| C2  | 1 | 0.91750 | 0.31069  | 0.33203  | C2  | 0.071 |
| C3  | 1 | 0.85774 | 0.33202  | 0.37033  | C3  | 0.063 |
| C4  | 1 | 0.91121 | 0.21394  | 0.30801  | C4  | 0.037 |
| C5  | 1 | 0.90874 | 0.12031  | 0.31930  | C5  | 0.019 |
| C6  | 1 | 0.90142 | 0.05539  | 0.28064  | C6  | 0.038 |
| C7  | 1 | 0.90957 | -0.04354 | 0.28556  | C7  | 0.055 |
| C8  | 1 | 0.90077 | -0.08198 | 0.24197  | C8  | 0.049 |
| C9  | 1 | 0.88625 | -0.00607 | 0.20930  | C9  | 0.044 |
| C10 | 1 | 0.87192 | -0.01776 | 0.16080  | C10 | 0.024 |
| C11 | 1 | 0.85582 | 0.05863  | 0.13027  | C11 | 0.039 |
| C12 | 1 | 0.83535 | 0.04807  | 0.08088  | C12 | 0.045 |
| C13 | 1 | 0.83343 | 0.13595  | 0.06195  | C13 | 0.041 |
| C14 | 1 | 0.85044 | 0.20015  | 0.09965  | C14 | 0.035 |
| C15 | 1 | 0.85717 | 0.29730  | 0.09454  | C15 | 0.045 |
| C16 | 1 | 0.86615 | 0.35884  | 0.13267  | C16 | 0.063 |
| C17 | 1 | 0.86207 | 0.45847  | 0.12957  | C17 | 0.095 |
| C18 | 1 | 0.86556 | 0.49260  | 0.17459  | C18 | 0.087 |
| C19 | 1 | 0.87342 | 0.41476  | 0.20621  | C19 | 0.055 |
| C20 | 1 | 0.88432 | 0.42283  | 0.25644  | C20 | 0.039 |
| C21 | 1 | 0.84228 | 0.35067  | 0.45393  | C21 | 0.093 |
| C22 | 1 | 0.91125 | 0.08860  | 0.36993  | C22 | 0.031 |
| C23 | 1 | 0.96079 | 0.13273  | 0.40268  | C23 | 0.057 |
| C24 | 1 | 0.96279 | 0.10504  | 0.45030  | C24 | 0.062 |
| C25 | 1 | 0.91673 | 0.03057  | 0.46566  | C25 | 0.040 |
| C26 | 1 | 0.86705 | -0.01327 | 0.43379  | C26 | 0.042 |
| C27 | 1 | 0.86286 | 0.01630  | 0.38650  | C27 | 0.030 |
| C28 | 1 | 0.87861 | -0.11203 | 0.13836  | C28 | 0.033 |
| C29 | 1 | 0.82743 | -0.18569 | 0.14925  | C29 | 0.048 |
| C30 | 1 | 0.83489 | -0.27186 | 0.12657  | C30 | 0.051 |
| C31 | 1 | 0.89395 | -0.28606 | 0.09315  | C31 | 0.057 |
| C32 | 1 | 0.94570 | -0.21494 | 0.08287  | C32 | 0.044 |
| C33 | 1 | 0.93824 | -0.12840 | 0.10519  | C33 | 0.031 |
| C34 | 1 | 0.85490 | 0.33681  | 0.04484  | C34 | 0.046 |
| C39 | 1 | 0.78626 | 0.33684  | 0.01772  | C39 | 0.044 |
| C38 | 1 | 0.78704 | 0.36841  | -0.02935 | C38 | 0.052 |
| C37 | 1 | 0.85541 | 0.40158  | -0.04943 | C37 | 0.061 |
| C36 | 1 | 0.92348 | 0.40469  | -0.02279 | C36 | 0.059 |



|     |   |         |         |         |     |       |
|-----|---|---------|---------|---------|-----|-------|
| C35 | 1 | 0.92367 | 0.37249 | 0.02453 | C35 | 0.064 |
| C40 | 1 | 0.88045 | 0.51529 | 0.28053 | C40 | 0.072 |
| C41 | 1 | 0.81397 | 0.57145 | 0.27689 | C41 | 0.094 |
| C42 | 1 | 0.81073 | 0.65895 | 0.29869 | C42 | 0.132 |
| C43 | 1 | 0.87429 | 0.69199 | 0.32426 | C43 | 0.139 |
| C44 | 1 | 0.94063 | 0.63786 | 0.32770 | C44 | 0.124 |
| C45 | 1 | 0.94349 | 0.54951 | 0.30625 | C45 | 0.096 |

## 7) References

- [1] J. A. S. Cavaleiro; V. M. Gerdan; H. K. Hombrecher; M. G. P. M. S. Neves; A. M. S. Silva; *Heterocyclic Commun.* **1997**, 3, (3), 253-261.
- [2] SAINT, Bruker Analytical X-Ray Systems, Madison, WI, current version.
- [3] An empirical correction for absorption anisotropy, R. Blessing, *Acta Cryst.* A51, 33 - 38 (1995).
- [4] SIR-92, A. Altomare; G. Cascarno; C. Giacovazzo; A. Gualardi; *J. Appl. Cryst.* 26, 343-350 (1993).
- [5] SHELXTL-Plus, Bruker Analytical X-Ray Systems, Madison, WI, current version.
